# Supplementary material for: Scaling of the permanent electric dipole moment in isolated silicon clusters with near-spherical shape
Source: Royal Society of Chemistry journal article supplement (doi:10.1039/d3cp00926b), 2023-01-01
Supplement: d3cp00926b1.pdf [file d3cp00926b1.pdf]

## Supporting Information

### Scaling of the Permanent Electric Dipole Moment in Isolated Silicon Clusters with Near-Spherical Shape

Filip Rivic,\* Andreas Lehr, and Rolf Schäfer

*Technical University of Darmstadt, Eduard-Zintl-Institut, Alarich-Weiss-Straße 8, 64287 Darmstadt, Germany.*

---

#### 1. Mass Spectrum

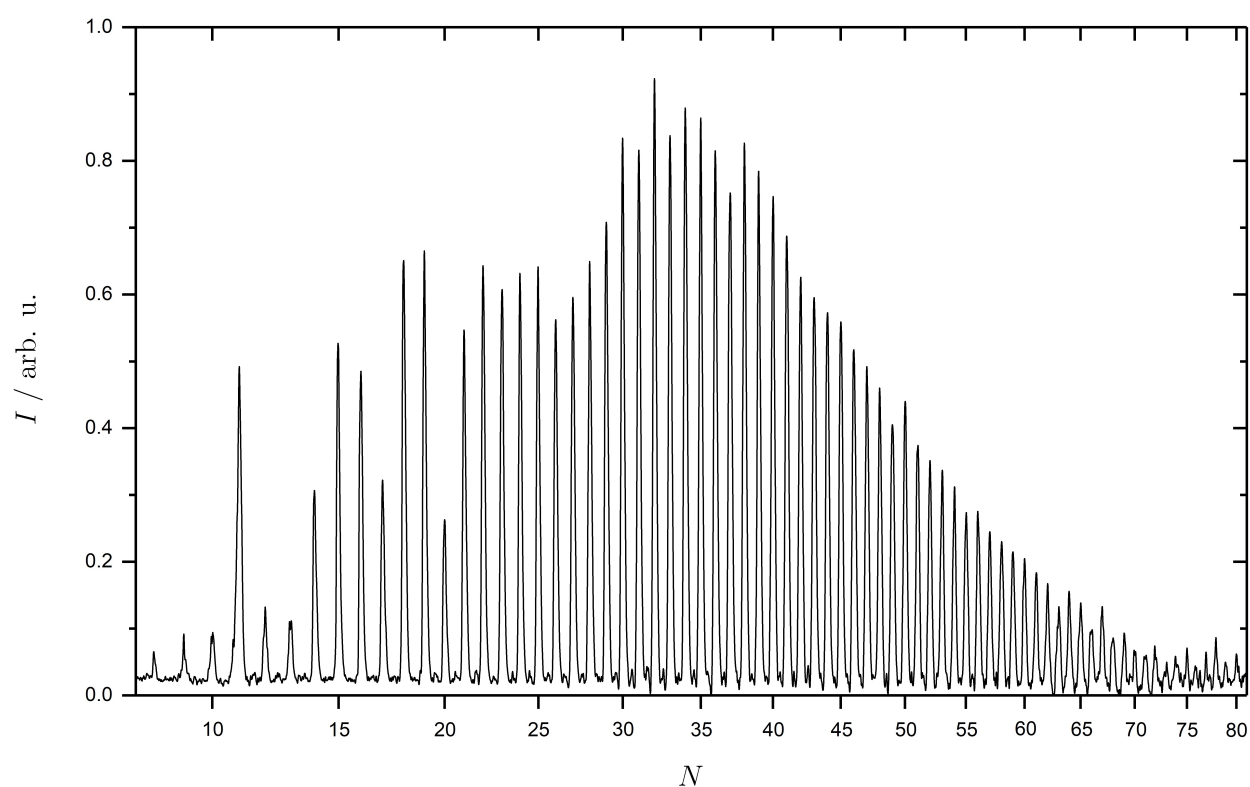

**Figure S1.** Time-of-flight mass spectrum of  $\text{Si}_N$  clusters generated by laser vaporization of a silicon target rod at  $T_{\text{nozzle}} = 16$  K and subsequent photoionization by an  $\text{F}_2$  excimer laser (7.89 eV). The mass spectrum corresponds to an electric deflection measurement with  $U = 11$  kV.

---

\*Corresponding author: filip.rivic@tu-darmstadt.de

## 2. Electric Beam Deflection Measurements

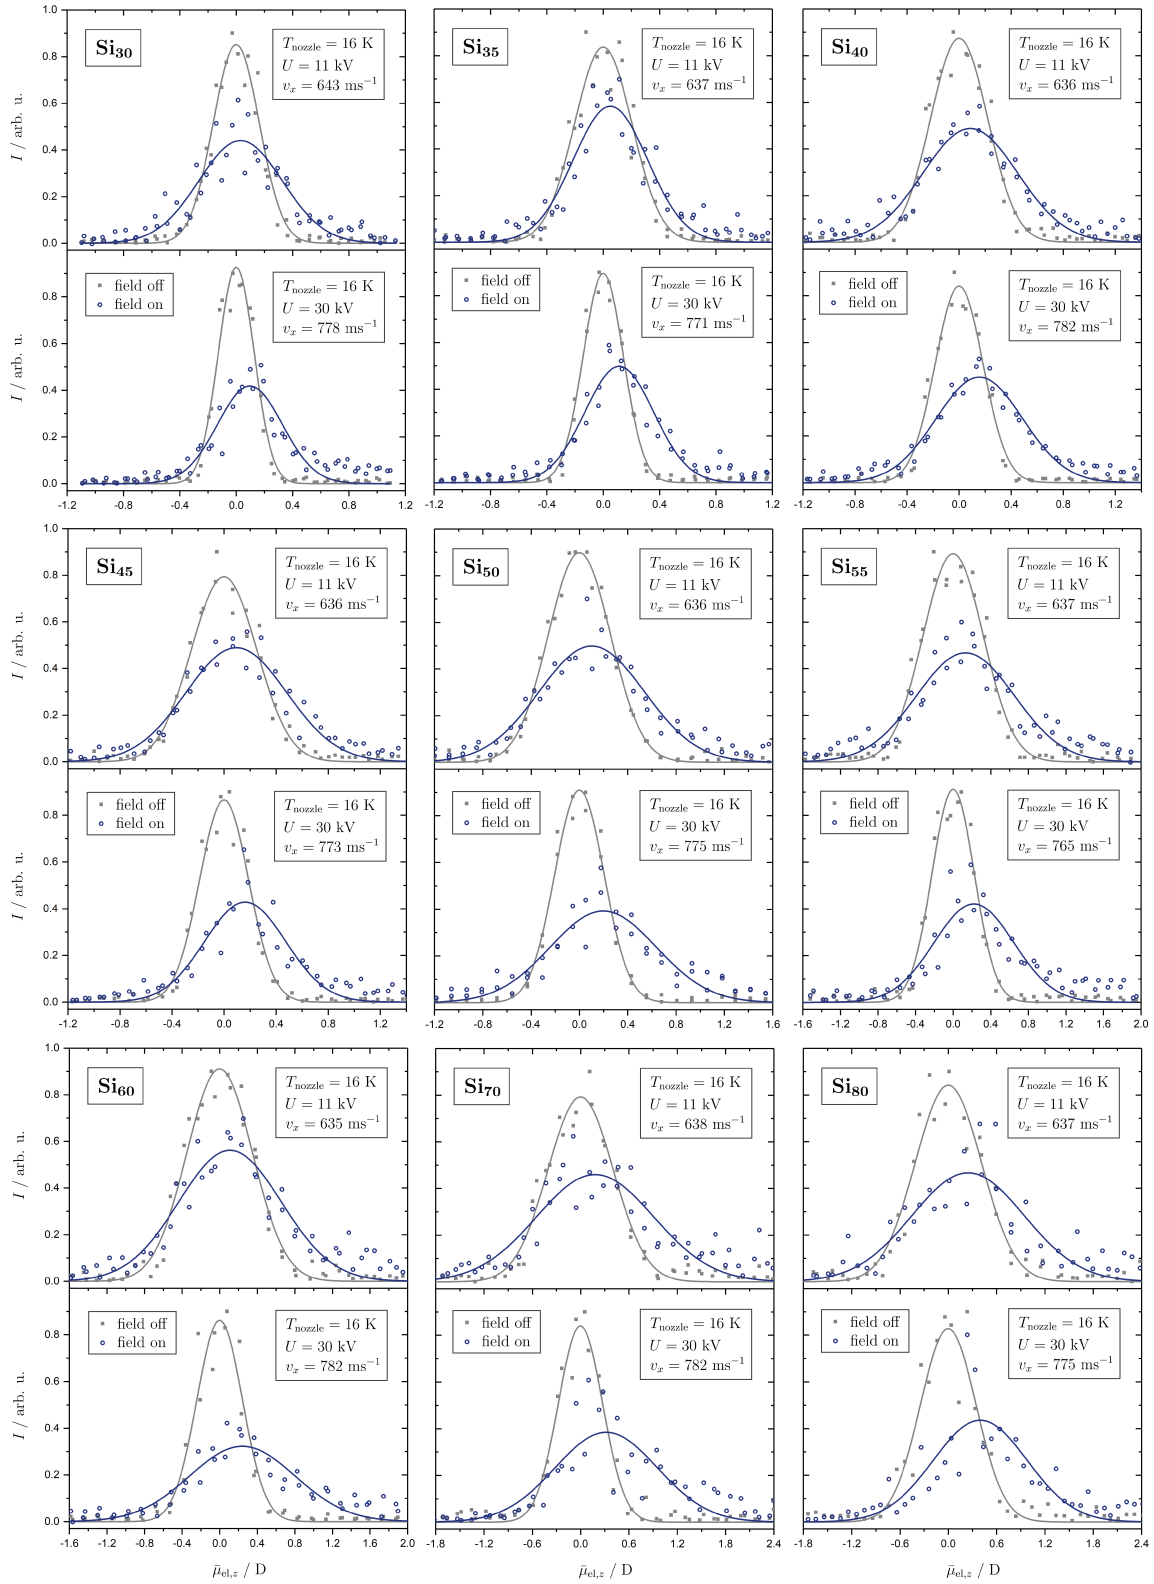

**Figure S2.** Electric beam deflection profiles of  $\text{Si}_N$  with  $N = 30, 35, 40, 45, 50, 55, 60, 70$  and  $80$  at  $T_{\text{nozzle}} = 16$  K and deflection voltages of  $U = 11$  kV (top) and  $30$  kV (bottom). The measured intensity  $I$  is given as a function of the projection of the observed electric dipole moment on the field direction averaged over the length of the deflection unit and all quantum states  $\bar{\mu}_{\text{el},z}$ . The gray squares represent the cluster intensity without applied field whereas blue open circles represent the intensity with applied field. Gaussians are fitted to the experimental data without applied field (gray line) and to the data with applied field (blue line). The velocities of the clusters in beam direction  $v_x$  are given as well.

**Table S1.** Experimental electric permanent dipole moments and polarizabilities per atom  $\mu/N$  and  $\alpha_{\text{eff}}/N$  of  $\text{Si}_N$  clusters with  $N = 30, 35, 40, 45, 50, 55, 60, 70$  and  $80$  shown together with experimental uncertainties.

| $N$ | Experiment (11 kV)                  |                                                | Experiment (30 kV)                  |                                                |
|-----|-------------------------------------|------------------------------------------------|-------------------------------------|------------------------------------------------|
|     | $\frac{\mu}{N} / 10^{-2} \text{ D}$ | $\frac{\alpha_{\text{eff}}}{N} / \text{\AA}^3$ | $\frac{\mu}{N} / 10^{-2} \text{ D}$ | $\frac{\alpha_{\text{eff}}}{N} / \text{\AA}^3$ |
| 30  | $2.41 \pm 0.18$                     | $4.15 \pm 2.03$                                | $1.91 \pm 0.12$                     | $4.84 \pm 0.50$                                |
| 35  | $1.40 \pm 0.16$                     | $5.87 \pm 1.39$                                | $1.67 \pm 0.08$                     | $4.86 \pm 0.35$                                |
| 40  | $2.12 \pm 0.13$                     | $8.77 \pm 1.48$                                | $2.07 \pm 0.09$                     | $5.84 \pm 0.41$                                |
| 45  | $1.92 \pm 0.14$                     | $8.55 \pm 1.52$                                | $1.65 \pm 0.11$                     | $5.40 \pm 0.45$                                |
| 50  | $2.09 \pm 0.14$                     | $8.35 \pm 1.53$                                | $2.25 \pm 0.11$                     | $5.89 \pm 0.51$                                |
| 55  | $2.16 \pm 0.15$                     | $9.70 \pm 1.63$                                | $1.92 \pm 0.13$                     | $5.99 \pm 0.56$                                |
| 60  | $2.06 \pm 0.16$                     | $7.46 \pm 1.68$                                | $2.44 \pm 0.16$                     | $5.94 \pm 0.73$                                |
| 70  | $2.35 \pm 0.20$                     | $9.98 \pm 2.31$                                | $2.34 \pm 0.18$                     | $6.67 \pm 0.82$                                |
| 80  | $1.95 \pm 0.23$                     | $12.53 \pm 2.48$                               | $1.61 \pm 0.19$                     | $7.38 \pm 0.78$                                |

### 3. Computed Dielectric Properties of $\text{Si}_{30}$

To get a feeling for the uncertainties of the DFT-predicted dielectric properties comprising the permanent dipole moment  $\mu$  and the polarizability  $\alpha_{\text{el}}$ , a series of hybrid functionals is employed, namely the PBE0<sup>1</sup>, B3LYP<sup>2</sup>, B3P86<sup>3</sup>, M06<sup>4</sup>, TPSSh<sup>5-7</sup>, HSE06<sup>8,9</sup>, CAM-B3LYP<sup>10</sup>, LC- $\omega$ PBEh<sup>11,12</sup> and the double-hybrid B2PLYP.<sup>13,14</sup> The calculations comprise a geometry optimization as well as a subsequent frequency analysis and the computation of dielectric properties using Gaussian16<sup>15</sup> and Orca v5.0.3<sup>16-18</sup> and the results are summarized in Tab. S2. The optimized geometries all mimic the same structural isomer, but small changes in bond lengths and angles can be observed being, *inter alia*, reflected in large dipole moment and vibrational frequency deviations compared to the chosen PBE0 result. Due to an overall good performance in the description of pure tetrel clusters in the past, the PBE0 functional is employed for all further calculations.<sup>19-24</sup>

**Table S2.** Computed electric permanent dipole moments and polarizabilities  $\mu$  and  $\alpha_{\text{el}}$  together with the computed lowest vibrational frequencies  $\tilde{\nu}_{\text{min}}$  for the  $\text{Si}_{30}$  cluster. A series of hybrid functionals is compared all employing the cc-pVTZ basis set.<sup>25</sup>

|                   | $\mu / \text{D}$ | $\frac{\mu}{N} / 10^{-2} \text{ D}$ | $\alpha_{\text{el}} / \text{\AA}^3$ | $\frac{\alpha_{\text{el}}}{N} / \text{\AA}^3$ | $\tilde{\nu}_{\text{min}} / \text{cm}^{-1}$ |
|-------------------|------------------|-------------------------------------|-------------------------------------|-----------------------------------------------|---------------------------------------------|
| <b>PBE0</b>       | <b>1.14</b>      | <b>3.80</b>                         | <b>130.32</b>                       | <b>4.34</b>                                   | <b>38.79</b>                                |
| B3LYP             | 0.72             | 2.41                                | 135.39                              | 4.51                                          | 53.84                                       |
| B3P86             | 0.96             | 3.21                                | 132.08                              | 4.40                                          | 21.70                                       |
| M06               | 1.16             | 3.86                                | 132.65                              | 4.42                                          | 58.28                                       |
| TPSSh             | 1.54             | 5.12                                | 131.53                              | 4.38                                          | 40.77                                       |
| HSE06             | 1.07             | 3.55                                | 131.41                              | 4.38                                          | 30.67                                       |
| CAM-B3LYP         | 2.49             | 8.30                                | 128.71                              | 4.29                                          | 46.46                                       |
| LC- $\omega$ PBEh | 1.14             | 3.78                                | 123.14                              | 4.10                                          | 58.94                                       |
| B2PLYP            | 1.12             | 3.73                                | 136.29                              | 4.54                                          | 29.33                                       |

## 4. Cartesian Coordinates and Mulliken Partial Charges

**Table S3.** Cartesian coordinates and Mulliken partial charges  $\delta q$  for the  $\text{Si}_{30}$  and  $\text{Si}_{35}$  clusters optimized and computed at the PBE0/cc-pVTZ level of theory.

| Si | $\text{Si}_{30}$ |            |            |            | $\text{Si}_{35}$ |           |            |            |
|----|------------------|------------|------------|------------|------------------|-----------|------------|------------|
|    | $x$              | $y$        | $z$        | $\delta q$ | $x$              | $y$       | $z$        | $\delta q$ |
| 1  | 2.863 824        | 1.980 894  | 1.535 121  | 0.093      | -2.103 777       | -1.365338 | 2.410 320  | 0.031      |
| 2  | 1.059 321        | -3.218 005 | -0.727 860 | 0.079      | 3.690 445        | -0.066920 | 2.609 629  | -0.036     |
| 3  | -3.131 029       | 0.097 092  | 1.957 971  | 0.092      | -2.222 422       | 2.315990  | 1.321 001  | 0.116      |
| 4  | -0.705 504       | 1.310 417  | -3.090 951 | 0.029      | -0.540 547       | -3.007734 | -1.701 585 | 0.054      |
| 5  | -1.850 102       | -2.740 785 | 0.209 044  | 0.061      | 2.877 817        | -3.411155 | 0.310 922  | 0.016      |
| 6  | 0.651 384        | 3.114 938  | -0.941 488 | 0.092      | -0.552 297       | -0.077798 | 3.736 415  | 0.060      |
| 7  | 2.242 033        | 1.600 377  | -1.636 982 | 0.026      | -3.247 984       | -2.272280 | -0.200 464 | 0.126      |
| 8  | -0.985 990       | -3.061 397 | 2.416 836  | 0.015      | -2.797 598       | -0.645219 | -1.804 704 | 0.034      |
| 9  | -3.289 692       | 0.171 235  | -1.446 032 | 0.105      | -2.054 247       | 2.406724  | -1.873 534 | 0.046      |
| 10 | 3.341 239        | -0.922 285 | 0.077 248  | 0.001      | 1.262 889        | 3.379696  | 2.337 340  | 0.019      |
| 11 | 3.092 466        | -1.764 935 | 2.268 536  | 0.004      | 4.364 027        | -0.094322 | -1.519 487 | 0.068      |
| 12 | -2.485 314       | 2.065 211  | -0.444 730 | 0.037      | 1.539 247        | 3.131094  | -1.676 593 | 0.062      |
| 13 | -0.795 468       | -1.546 672 | -1.937 359 | -0.048     | 2.634 102        | -1.077906 | -3.027 125 | 0.032      |
| 14 | 0.051 731        | 0.741 336  | 3.996 842  | -0.014     | 0.527 557        | 0.023772  | -3.074 197 | 0.041      |
| 15 | -0.744 826       | 2.120 572  | 2.241 179  | 0.057      | 1.455 868        | -0.854967 | 2.786 679  | 0.043      |
| 16 | 1.418 389        | -0.873 361 | -2.461 638 | 0.036      | -1.032 756       | -3.144899 | 1.372 148  | 0.094      |
| 17 | -2.247 080       | -0.432 542 | -3.467 034 | -0.012     | -4.166 368       | 1.253930  | -1.842 485 | -0.027     |
| 18 | -3.039 416       | 2.491 820  | 1.807 973  | -0.036     | 3.513 608        | 2.155349  | -0.768 763 | 0.031      |
| 19 | 3.019 182        | -2.378 410 | -1.727 355 | 0.003      | 0.346 746        | 3.708996  | 0.184 179  | 0.095      |
| 20 | 1.866 801        | 0.199 992  | 2.604 522  | 0.033      | 2.617 648        | 1.652285  | 1.393 963  | 0.043      |
| 21 | -0.971 187       | -3.926 796 | -1.660 840 | -0.010     | -2.037 447       | -4.325663 | -0.394 139 | -0.038     |
| 22 | 1.536 084        | 0.975 343  | -3.810 111 | 0.027      | -3.691 604       | 0.759525  | 0.473 935  | 0.088      |
| 23 | -1.276 930       | -0.802 006 | 2.901 291  | 0.039      | 3.562 770        | -1.160433 | 0.520 747  | 0.086      |
| 24 | 1.028 129        | 3.418 365  | 1.337 136  | 0.088      | -4.383 695       | -1.244177 | 1.659 027  | -0.026     |
| 25 | -3.873 020       | -1.402 590 | 0.229 580  | 0.034      | -1.922 587       | 4.078932  | -0.192 443 | 0.001      |
| 26 | 1.079 382        | -2.621 673 | 1.550 285  | 0.008      | -0.805 464       | 2.270841  | 3.223 062  | 0.045      |
| 27 | 4.189 755        | 1.254 544  | -0.334 641 | -0.011     | -1.235 430       | -1.492533 | -3.348 994 | -0.013     |
| 28 | -1.341 217       | 3.314 547  | -2.098 698 | -0.017     | 1.189 911        | -3.080263 | 2.033 582  | 0.098      |
| 29 | -1.466 925       | -0.247 007 | 0.185 156  | -0.415     | -0.039 847       | 2.351570  | -3.314 714 | 0.065      |
| 30 | 0.763 978        | 1.081 784  | 0.466 997  | -0.395     | 1.728 386        | -2.852287 | -1.684 400 | 0.058      |
| 31 |                  |            |            |            | -1.434 842       | -0.352652 | 0.300 275  | -0.329     |
| 32 |                  |            |            |            | -0.118 723       | 1.381640  | -0.999 039 | -0.281     |
| 33 |                  |            |            |            | 0.794 690        | -1.584246 | 0.182 404  | -0.246     |
| 34 |                  |            |            |            | 1.999 873        | 0.215287  | -0.917 955 | -0.210     |
| 35 |                  |            |            |            | 0.282 053        | 1.025161  | 1.484 993  | -0.246     |

**Table S4.** Cartesian coordinates and Mulliken partial charges  $\delta q$  for the Si<sub>40</sub> and Si<sub>45</sub> clusters optimized and computed at the PBE0/cc-pVTZ level of theory.

| Si | Si <sub>40</sub> |            |            |            | Si <sub>45</sub> |           |            |            |
|----|------------------|------------|------------|------------|------------------|-----------|------------|------------|
|    | $x$              | $y$        | $z$        | $\delta q$ | $x$              | $y$       | $z$        | $\delta q$ |
| 1  | -3.189 538       | 1.483 332  | -3.347 302 | -0.036     | 2.073 077        | 3.004023  | 1.597 080  | 0.057      |
| 2  | -1.841 434       | -0.511 798 | -3.267 542 | 0.050      | -2.222 592       | 3.466688  | 1.905 582  | 0.064      |
| 3  | 0.606 851        | 3.257 451  | -1.725 014 | 0.064      | -0.927 329       | 3.375803  | -0.218 445 | 0.077      |
| 4  | 3.251 304        | 2.176 799  | -0.714 677 | 0.071      | 1.179 492        | 4.489593  | -0.040 350 | -0.039     |
| 5  | 1.935 243        | 0.528 451  | -2.947 714 | 0.022      | 4.353 735        | 2.217202  | 1.116 198  | 0.066      |
| 6  | -4.382 260       | 1.893 752  | 0.590 430  | 0.037      | 3.846 440        | -0.000640 | 1.767 624  | 0.083      |
| 7  | -2.484 414       | 3.177 774  | 0.146 421  | 0.091      | 4.353 693        | -2.218090 | 1.114 767  | 0.066      |
| 8  | 0.909 190        | 4.539 425  | 0.335 481  | 0.048      | 4.392 321        | 2.244623  | -1.454 181 | 0.060      |
| 9  | 0.516 543        | -0.674 789 | 1.813 928  | -0.185     | 3.731 514        | 0.000539  | -2.090 229 | 0.060      |
| 10 | 0.384 910        | -1.025 173 | -3.921 766 | 0.055      | 4.392 136        | -2.244015 | -1.455 618 | 0.060      |
| 11 | -3.579 030       | -1.395 200 | 0.892 134  | 0.060      | -1.374 395       | 1.890722  | -3.079 756 | 0.078      |
| 12 | -1.015 105       | -1.520 483 | 3.632 993  | 0.060      | 0.942 716        | 2.155338  | -3.683 190 | 0.054      |
| 13 | -0.255 127       | 0.009 460  | -1.550 517 | -0.208     | 2.077 769        | 3.036259  | -1.720 897 | 0.101      |
| 14 | 2.583 912        | 2.835 333  | -2.961 996 | -0.043     | -2.518 882       | 3.669080  | -1.990 439 | -0.060     |
| 15 | 2.278 509        | -0.082 218 | -0.605 548 | -0.179     | 1.179 181        | -4.489527 | -0.043 178 | -0.039     |
| 16 | -3.916 416       | 0.489 993  | -1.284 903 | 0.051      | 2.073 051        | -3.005210 | 1.595 231  | 0.057      |
| 17 | -2.130 080       | 0.773 835  | 0.468 892  | -0.321     | -0.927 596       | -3.375560 | -0.220 496 | 0.077      |
| 18 | -1.873 260       | -2.652 863 | 1.768 908  | 0.087      | 2.077 528        | -3.035257 | -1.722 812 | 0.102      |
| 19 | 0.872 750        | 2.033 881  | 0.292 642  | -0.217     | 1.217 968        | -2.211444 | 3.727 735  | 0.070      |
| 20 | -1.571 176       | 2.425 800  | -1.886 238 | 0.072      | 2.070 136        | -0.001181 | 3.305 161  | 0.051      |
| 21 | 3.610 445        | -3.420 411 | 0.732 269  | -0.019     | -1.138 458       | -1.795368 | 3.237 268  | 0.046      |
| 22 | 1.473 819        | 1.761 218  | 2.612 793  | 0.073      | -2.222 912       | -3.467775 | 1.903 407  | 0.064      |
| 23 | 2.756 841        | 3.386 962  | 1.275 332  | 0.021      | -2.310 737       | -0.001336 | 4.361 504  | -0.060     |
| 24 | -1.101 918       | -4.017 028 | -1.588 749 | 0.062      | -1.138 347       | 1.793328  | 3.238 431  | 0.046      |
| 25 | 3.634 428        | -1.045 548 | 1.120 954  | 0.059      | 1.218 113        | 2.208914  | 3.729 150  | 0.070      |
| 26 | 0.699 301        | -2.679 122 | -2.293 242 | 0.088      | -4.198 560       | -2.081795 | 1.359 934  | 0.035      |
| 27 | -0.628 857       | -4.401 813 | 0.828 596  | 0.054      | -3.449 563       | -0.000626 | 2.276 149  | 0.074      |
| 28 | 4.754 942        | 0.345 544  | -0.485 406 | 0.031      | -4.198 287       | 2.081120  | 1.361 211  | 0.035      |
| 29 | -4.751 303       | -1.739 578 | -1.092 711 | -0.017     | -3.615 113       | -1.847508 | -0.940 175 | 0.096      |
| 30 | 2.734 555        | -2.487 418 | -1.220 001 | 0.076      | 0.942 486        | -2.152937 | -3.684 465 | 0.054      |
| 31 | -0.720 438       | 3.436 387  | 1.588 991  | 0.052      | -1.374 589       | -1.888613 | -3.080 980 | 0.078      |
| 32 | 2.621 703        | -0.252 111 | 3.115 688  | 0.044      | -2.519 070       | -3.667637 | -1.992 753 | -0.060     |
| 33 | -0.432 586       | 2.600 047  | 3.794 158  | -0.032     | 1.699 282        | 0.000994  | -3.173 137 | 0.062      |
| 34 | -1.474 990       | 0.676 977  | 2.868 455  | 0.011      | -2.578 395       | 0.001400  | -4.052 465 | 0.036      |
| 35 | -3.812 709       | 0.407 459  | 2.372 155  | 0.056      | -4.327 114       | 0.000844  | -2.276 870 | 0.058      |
| 36 | -2.552 411       | -2.170 048 | -1.796 022 | 0.069      | -3.614 979       | 1.848296  | -0.939 058 | 0.096      |
| 37 | 1.348 842        | -3.162 209 | 1.366 318  | 0.052      | 2.509 609        | 1.181005  | -0.151 829 | -0.285     |
| 38 | -0.371 455       | -1.981 217 | -0.113 576 | -0.381     | -1.982 030       | 0.000613  | -1.570 505 | -0.284     |
| 39 | 1.267 542        | -2.207 026 | 3.576 066  | 0.054      | -1.882 106       | -1.309399 | 0.807 246  | -0.261     |
| 40 | 3.842 879        | -0.813 823 | -2.390 677 | 0.066      | 0.526 151        | -1.156607 | 1.591 371  | -0.004     |
| 41 |                  |            |            |            | 2.509 578        | -1.181023 | -0.152 526 | -0.285     |
| 42 |                  |            |            |            | 0.255 160        | -1.295543 | -1.330 826 | -0.195     |
| 43 |                  |            |            |            | -1.881 744       | 1.309011  | 0.808 020  | -0.261     |
| 44 |                  |            |            |            | 0.255 358        | 1.296388  | -1.330 140 | -0.195     |
| 45 |                  |            |            |            | 0.526 305        | 1.155308  | 1.592 252  | -0.004     |

**Table S5.** Cartesian coordinates and Mulliken partial charges  $\delta q$  for the Si<sub>50</sub> and Si<sub>55</sub> clusters optimized and computed at the PBE0/cc-pVTZ level of theory.

| Si | Si <sub>50</sub> |            |            |            | Si <sub>55</sub> |           |            |            |
|----|------------------|------------|------------|------------|------------------|-----------|------------|------------|
|    | $x$              | $y$        | $z$        | $\delta q$ | $x$              | $y$       | $z$        | $\delta q$ |
| 1  | 3.839 489        | -3.144 161 | 1.727 683  | -0.048     | -3.056 836       | 3.940318  | -1.723 646 | 0.056      |
| 2  | 0.738 124        | -1.317 824 | 1.289 172  | -0.087     | -4.397 158       | -1.051557 | -0.354 154 | -0.014     |
| 3  | 2.281 098        | -1.309 736 | -1.005 712 | -0.168     | -2.276 429       | 2.524065  | -3.593 556 | 0.044      |
| 4  | 4.276 463        | 0.675 735  | 2.965 635  | 0.055      | -1.810 602       | 1.798155  | -1.311 199 | -0.134     |
| 5  | -2.371 929       | 3.680 388  | 2.906 017  | -0.012     | 1.643 436        | 3.597969  | 1.139 223  | 0.052      |
| 6  | 1.022 371        | -1.156 156 | 4.503 349  | 0.026      | 0.897 169        | 4.268152  | -2.617 824 | -0.039     |
| 7  | -3.456 120       | 1.969 291  | 1.655 383  | 0.065      | 2.822 196        | -0.021107 | -3.120 226 | 0.044      |
| 8  | 1.881 579        | -3.398 101 | 0.371 769  | 0.051      | 1.146 314        | 0.623059  | -4.738 815 | 0.007      |
| 9  | -0.146 053       | -4.688 084 | 0.345 814  | 0.038      | 0.223 278        | 0.230257  | -1.573 486 | -0.193     |
| 10 | -0.810 508       | -2.271 125 | -0.451 852 | -0.138     | -2.993 734       | 0.404150  | 1.044 196  | -0.049     |
| 11 | -2.878 918       | 3.557 833  | -2.088 435 | 0.043      | -0.809 825       | 4.263484  | -0.943 781 | 0.044      |
| 12 | 1.634 823        | 1.995 308  | -0.016 391 | -0.212     | 0.096 522        | 2.110570  | -3.157 388 | 0.027      |
| 13 | -4.509 472       | 0.128 042  | 2.737 979  | 0.052      | 4.637 618        | 2.726968  | -0.920 161 | 0.067      |
| 14 | 5.439 289        | 0.664 038  | 0.759 596  | 0.026      | 0.575 340        | -0.805652 | 0.572 213  | 0.077      |
| 15 | -0.271 059       | 0.911 318  | 1.051 313  | -0.120     | -1.080 609       | -0.371933 | 2.170 843  | -0.221     |
| 16 | 4.373 228        | -1.868 156 | -2.240 065 | 0.048      | 2.850 918        | -2.289850 | -2.401 796 | 0.053      |
| 17 | -1.960 816       | -0.142 234 | -3.500 263 | 0.051      | -2.077 064       | -0.747471 | -1.392 276 | -0.131     |
| 18 | -3.935 493       | -1.428 066 | -2.985 615 | 0.033      | 2.369 046        | 3.312535  | -1.053 542 | 0.050      |
| 19 | 2.432 900        | 2.094 623  | 2.606 664  | 0.103      | -0.633 151       | -2.702550 | -0.612 244 | -0.357     |
| 20 | -1.134 442       | 2.010 787  | -1.068 754 | -0.281     | 2.346 415        | 0.412617  | 1.600 384  | -0.110     |
| 21 | -0.867 018       | -1.851 983 | 3.082 279  | 0.048      | -5.503 210       | 0.730725  | -1.555 024 | -0.033     |
| 22 | 0.819 791        | 3.470 168  | -1.952 051 | 0.068      | -2.527 837       | -3.786618 | 0.599 590  | 0.054      |
| 23 | -1.768 072       | -3.325 168 | 1.501 723  | 0.068      | 2.973 930        | 0.893993  | -0.867 207 | -0.238     |
| 24 | 3.328 136        | 0.284 846  | -2.566 640 | 0.050      | -0.295 426       | 2.356977  | 0.521 843  | -0.208     |
| 25 | 2.750 823        | -1.341 671 | 2.842 108  | 0.049      | -3.518 203       | 0.576378  | -2.891 506 | 0.072      |
| 26 | -2.273 414       | -0.280 388 | 1.753 674  | -0.306     | 4.494 652        | 1.565695  | 1.193 047  | 0.045      |
| 27 | 2.892 715        | 3.966 598  | -0.777 257 | 0.071      | 4.666 985        | -3.102137 | -1.082 476 | 0.050      |
| 28 | -1.008 326       | 4.502 843  | -0.835 050 | 0.069      | 2.817 263        | -1.632322 | -0.111 121 | -0.204     |
| 29 | 0.221 878        | -0.253 006 | -1.818 054 | -0.170     | -1.440 698       | -1.902734 | 4.068 869  | 0.070      |
| 30 | 4.570 463        | -1.508 724 | 0.121 791  | 0.091      | -0.366 159       | 4.853718  | 1.323 136  | 0.041      |
| 31 | 2.606 811        | -3.551 777 | -1.995 589 | 0.052      | -3.834 575       | 0.663518  | 3.263 008  | 0.050      |
| 32 | 3.927 795        | 1.739 282  | -0.832 134 | 0.077      | 6.003 015        | -0.230620 | 1.552 910  | -0.056     |
| 33 | 1.772 793        | 4.003 889  | 1.425 572  | 0.038      | 1.619 867        | 1.195815  | 3.737 546  | 0.004      |
| 34 | 1.334 590        | 0.909 798  | -3.592 008 | 0.009      | -1.622 679       | 3.073811  | 2.309 051  | 0.051      |
| 35 | 2.962 048        | 0.184 525  | 0.956 028  | -0.218     | 0.675 631        | -2.923269 | -2.676 837 | 0.088      |
| 36 | -1.026 954       | -4.233 140 | -1.909 551 | 0.055      | 0.668 809        | -2.181117 | 3.054 420  | 0.059      |
| 37 | -4.881 502       | -0.130 710 | -1.132 785 | 0.085      | -2.244 155       | 0.208117  | 5.122 431  | 0.005      |
| 38 | -4.008 569       | -3.651 328 | 0.665 320  | -0.039     | -2.846 898       | -2.346854 | 2.330 906  | 0.070      |
| 39 | 0.650 315        | 0.935 981  | 3.456 388  | 0.061      | -4.030 937       | 2.183695  | -0.313 077 | 0.042      |
| 40 | -1.526 243       | 2.142 348  | -3.467 061 | 0.058      | -0.207 289       | -1.011674 | -3.641 539 | 0.055      |
| 41 | -3.601 987       | 1.807 387  | -0.658 499 | 0.086      | 4.956 111        | 0.788747  | -2.368 105 | 0.040      |
| 42 | 0.557 181        | 3.011 573  | -4.276 722 | -0.025     | -2.608 132       | -3.136594 | -2.281 793 | 0.083      |
| 43 | -2.660 183       | -0.427 587 | 4.241 729  | 0.029      | 1.165 211        | -3.466383 | 1.151 113  | 0.077      |
| 44 | 0.094 931        | -1.019 097 | -4.298 639 | 0.064      | -0.721 311       | 1.385841  | 3.699 388  | 0.046      |
| 45 | -1.556 225       | 1.592 355  | 3.617 093  | 0.149      | -0.747 884       | -4.736510 | -2.222 696 | 0.057      |
| 46 | -2.428 125       | -0.466 750 | -1.097 401 | -0.274     | 3.556 840        | -3.588719 | 1.169 328  | 0.049      |
| 47 | 0.559 334        | -2.658 223 | -2.712 643 | 0.067      | -4.407 815       | -3.439169 | -0.836 574 | -0.026     |
| 48 | -2.985 293       | -3.008 895 | -1.420 203 | 0.062      | -2.526 362       | -1.383081 | -3.835 527 | 0.071      |
| 49 | -4.285 942       | -1.300 151 | 0.859 105  | 0.046      | 3.964 577        | -1.380349 | 2.105 261  | 0.040      |
| 50 | -0.616 307       | 3.493 283  | 1.256 190  | 0.052      | 5.117 151        | -0.764960 | -0.575 578 | 0.090      |
| 51 |                  |            |            |            | 2.468 435        | -0.988139 | 3.899 435  | 0.049      |
| 52 |                  |            |            |            | -3.928 614       | 2.692714  | 2.049 352  | 0.023      |
| 53 |                  |            |            |            | -4.824 944       | -1.102107 | 2.072 958  | 0.043      |
| 54 |                  |            |            |            | -0.534 752       | -5.043596 | 0.248 122  | 0.037      |
| 55 |                  |            |            |            | 3.116 558        | 2.755025  | 2.774 580  | 0.034      |

**Table S6.** Cartesian coordinates and Mulliken partial charges  $\delta q$  for the Si<sub>60</sub> and Si<sub>70</sub> clusters optimized and computed at the PBE0/cc-pVTZ level of theory.

| Si | Si <sub>60</sub> |            |            |            | Si <sub>70</sub> |           |            |            |
|----|------------------|------------|------------|------------|------------------|-----------|------------|------------|
|    | <i>x</i>         | <i>y</i>   | <i>z</i>   | $\delta q$ | <i>x</i>         | <i>y</i>  | <i>z</i>   | $\delta q$ |
| 1  | -0.885 438       | -1.737 749 | -1.448 508 | -0.268     | -0.001 084       | 6.052921  | -1.112 895 | -0.021     |
| 2  | 0.752 243        | 1.932 539  | -1.764 414 | -0.213     | -0.712 083       | 4.801173  | 0.771 012  | 0.003      |
| 3  | 1.931 594        | -0.300 929 | -2.194 488 | -0.319     | 0.826 025        | 4.066648  | 2.478 454  | 0.097      |
| 4  | -1.221 596       | 0.496 194  | -2.065 631 | 0.103      | -0.268 672       | 2.543405  | 3.783 064  | 0.075      |
| 5  | -0.114 224       | -1.596 632 | 0.732 745  | 0.153      | 0.486 745        | 1.056797  | 5.522 967  | -0.015     |
| 6  | -2.140 039       | 0.105 258  | 2.347 314  | -0.333     | -0.630 681       | -0.689212 | 4.328 650  | -0.058     |
| 7  | 2.149 719        | -2.153 886 | 0.989 249  | -0.303     | 0.303 680        | -2.673786 | 3.537 961  | 0.140      |
| 8  | 2.622 524        | 1.249 826  | 0.380 169  | -0.177     | -0.892 868       | -4.056607 | 1.999 887  | 0.020      |
| 9  | -0.618 212       | 2.346 932  | 1.513 466  | -0.103     | 0.663 303        | -5.648209 | 1.083 926  | -0.020     |
| 10 | 0.703 920        | 0.461 825  | 1.440 975  | 0.114      | -0.025 552       | -5.046366 | -1.088 273 | 0.065      |
| 11 | -3.067 194       | -1.359 400 | -0.407 540 | -0.106     | 1.382 547        | -4.415726 | -2.892 805 | 0.112      |
| 12 | -2.435 615       | 0.981 306  | 0.022 246  | -0.165     | 0.072 753        | -2.654677 | -3.639 941 | 0.061      |
| 13 | 4.216 332        | -3.124 700 | 0.400 608  | 0.088      | 0.846 841        | -0.757719 | -4.918 968 | 0.076      |
| 14 | 2.646 714        | -4.480 496 | 1.577 158  | 0.078      | -0.662 289       | 1.059942  | -4.391 208 | 0.050      |
| 15 | 5.559 109        | -1.726 458 | 1.805 994  | -0.030     | -0.064 777       | 3.338695  | -4.093 010 | 0.002      |
| 16 | 4.983 890        | 0.341 427  | 0.783 812  | 0.023      | -1.179 273       | 4.205042  | -2.131 778 | -0.030     |
| 17 | 4.294 951        | 0.965 120  | -1.378 053 | 0.046      | 1.905 432        | 4.631794  | -1.162 817 | 0.113      |
| 18 | 4.192 706        | 3.029 309  | -2.568 973 | -0.027     | 1.904 045        | 3.073820  | -2.926 938 | 0.014      |
| 19 | 2.419 946        | 3.549 331  | -1.032 809 | 0.008      | 3.774 924        | 1.814830  | -3.563 056 | 0.110      |
| 20 | 0.866 457        | 5.391 825  | -1.391 738 | -0.024     | 2.927 379        | -0.373009 | -3.867 425 | 0.026      |
| 21 | 3.585 316        | -1.265 800 | 3.073 194  | 0.034      | 4.457 142        | -2.043717 | -3.402 373 | -0.033     |
| 22 | -1.246 827       | -3.182 530 | 2.105 345  | 0.007      | 3.243 482        | -3.346301 | -1.853 537 | -0.009     |
| 23 | -0.214 558       | -3.001 906 | 4.246 120  | -0.038     | 4.411 853        | -4.331218 | -0.057 544 | -0.025     |
| 24 | 1.997 724        | -2.924 832 | 3.284 149  | 0.052      | 2.441 865        | -4.071564 | 1.231 436  | -0.035     |
| 25 | -0.671 465       | -0.685 096 | 4.111 188  | 0.069      | 2.519 888        | -3.354798 | 3.540 584  | 0.063      |
| 26 | 2.410 409        | 1.894 132  | -3.663 262 | 0.080      | 3.453 435        | -1.204908 | 3.245 079  | 0.011      |
| 27 | -0.647 496       | 3.888 514  | -2.397 971 | -0.015     | 2.390 269        | 0.697034  | 4.175 945  | 0.084      |
| 28 | 0.297 024        | 2.754 339  | -4.235 959 | 0.079      | 3.445 696        | 2.290773  | 2.994 946  | 0.132      |
| 29 | -2.967 957       | 3.971 431  | -1.925 769 | -0.028     | 3.117 776        | 4.573170  | 2.604 337  | -0.007     |
| 30 | -3.458 176       | 1.693 104  | -2.218 070 | 0.040      | 3.456 785        | 3.907964  | 0.350 434  | 0.017      |
| 31 | -3.095 578       | 0.287 248  | -4.094 301 | 0.058      | 5.587 899        | 2.913508  | 0.028 989  | -0.027     |
| 32 | -0.763 813       | 0.647 803  | -4.396 473 | 0.027      | 5.000 983        | 1.319632  | -1.560 959 | 0.044      |
| 33 | -3.276 690       | -1.772 624 | -2.981 695 | 0.067      | 5.517 765        | -0.918011 | -1.630 064 | 0.057      |
| 34 | 2.799 017        | -0.272 318 | -4.579 840 | 0.065      | 5.139 878        | -2.107166 | 0.332 947  | 0.030      |
| 35 | 4.228 836        | -0.968 310 | -2.805 268 | 0.080      | 5.620 401        | -0.890984 | 2.316 068  | 0.016      |
| 36 | 3.116 943        | -2.636 352 | -1.597 284 | 0.055      | 4.794 467        | 1.163649  | 1.437 621  | 0.010      |
| 37 | 0.671 461        | -1.159 753 | -4.076 563 | 0.113      | -2.833 308       | 4.801699  | 1.739 855  | 0.009      |
| 38 | -2.469 904       | -3.985 941 | -3.441 937 | -0.013     | -2.449 791       | 2.782874  | 2.928 162  | 0.070      |
| 39 | -0.165 773       | -3.155 103 | -3.150 007 | -0.002     | -3.799 695       | 0.948936  | 3.353 656  | 0.039      |
| 40 | 1.707 937        | -4.361 591 | -2.278 864 | -0.009     | -2.967 686       | -0.836221 | 4.551 392  | 0.015      |
| 41 | -2.418 511       | -3.911 346 | -1.023 562 | 0.062      | -3.504 498       | -2.260714 | 2.770 982  | 0.039      |
| 42 | -1.170 882       | -5.025 108 | 0.609 520  | -0.003     | -3.146 286       | -4.582869 | 2.504 615  | -0.016     |
| 43 | 0.951 285        | -4.379 024 | -0.064 851 | -0.003     | -3.640 262       | -3.992068 | 0.293 766  | 0.060      |
| 44 | -4.446 991       | -3.262 728 | 0.095 010  | 0.078      | -2.260 635       | -4.612695 | -1.520 423 | 0.116      |
| 45 | -0.384 246       | 4.772 359  | 0.512 576  | 0.060      | -2.189 023       | -2.733809 | -2.990 604 | 0.005      |
| 46 | -2.474 669       | 3.607 117  | 0.383 428  | -0.007     | -3.981 133       | -1.703633 | -4.180 978 | -0.025     |
| 47 | -4.031 422       | 3.557 842  | 2.232 626  | -0.027     | -2.853 568       | 0.401256  | -4.046 199 | 0.070      |
| 48 | -4.384 762       | 1.302 259  | 1.538 949  | 0.098      | -3.936 518       | 1.994340  | -2.701 425 | 0.034      |
| 49 | -4.858 766       | 0.582 346  | -0.671 266 | 0.095      | -3.541 981       | 4.244439  | -2.291 067 | -0.005     |
| 50 | -5.192 350       | -1.663 173 | -1.545 654 | 0.047      | -3.948 352       | 3.772577  | -0.044 361 | 0.071      |
| 51 | 4.030 109        | 1.747 803  | 2.305 128  | 0.056      | -4.975 331       | 1.735849  | 0.285 715  | 0.028      |
| 52 | 3.078 793        | 3.609 039  | 1.269 444  | 0.059      | -5.849 489       | 0.756178  | 2.231 493  | -0.001     |
| 53 | -0.028 087       | 3.016 034  | 4.054 543  | 0.055      | -5.128 641       | -1.327958 | 1.432 513  | 0.060      |
| 54 | 0.941 192        | 4.039 288  | 2.208 277  | 0.016      | -5.526 070       | -2.777137 | -0.341 389 | -0.010     |
| 55 | -2.247 007       | 2.415 354  | 3.378 507  | 0.047      | -4.678 714       | -1.211470 | -1.908 105 | -0.041     |
| 56 | 1.043 839        | 0.886 973  | 3.760 844  | -0.035     | -5.713 422       | 0.901109  | -1.764 939 | 0.000      |
| 57 | 3.355 740        | 0.703 852  | 4.358 024  | -0.037     | 1.068 861        | -2.516861 | -1.211 988 | -0.162     |
| 58 | -3.367 051       | -2.153 952 | 1.932 582  | 0.084      | 3.556 628        | -0.315759 | 0.075 803  | -0.238     |
| 59 | -4.369 297       | -0.451 224 | 3.199 184  | 0.044      | -2.257 148       | -0.825313 | 1.214 191  | -0.235     |
| 60 | -2.721 136       | 0.471 235  | 4.748 375  | 0.048      | -2.426 095       | -1.188732 | -1.180 064 | 0.009      |
| 61 |                  |            |            |            | -1.034 744       | -2.925524 | -0.079 830 | -0.185     |
| 62 |                  |            |            |            | 1.920 139        | -1.775655 | 1.485 479  | -0.052     |
| 63 |                  |            |            |            | 2.428 138        | 0.876978  | -1.689 357 | -0.042     |
| 64 |                  |            |            |            | -2.547 492       | 1.545083  | 0.877 966  | -0.253     |
| 65 |                  |            |            |            | -0.911 822       | 2.407577  | -0.599 332 | -0.050     |
| 66 |                  |            |            |            | 1.418 660        | 2.374521  | -0.183 927 | -0.195     |
| 67 |                  |            |            |            | 1.183 344        | 1.493762  | 2.026 628  | -0.340     |
| 68 |                  |            |            |            | -0.059 589       | -0.548188 | 1.998 984  | 0.167      |
| 69 |                  |            |            |            | -1.343 747       | 0.651016  | -2.043 528 | -0.127     |
| 70 |                  |            |            |            | 0.673 292        | -0.480410 | -2.464 395 | 0.036      |

**Table S7.** Cartesian coordinates and Mulliken partial charges  $\delta q$  for the  $\text{Si}_{80}$  cluster optimized and computed at the PBE0/cc-pVTZ level of theory.

| $\text{Si}_{80}$ |            |            |            |            |    |            |            |            |            |
|------------------|------------|------------|------------|------------|----|------------|------------|------------|------------|
| Si               | $x$        | $y$        | $z$        | $\delta q$ | Si | $x$        | $y$        | $z$        | $\delta q$ |
| 1                | 5.874 190  | -0.849 970 | -2.417 883 | 0.040      | 41 | -1.326 637 | 5.103 481  | -0.793 771 | 0.083      |
| 2                | 4.448 778  | -1.095 447 | -4.424 884 | 0.029      | 42 | 0.314 006  | 6.398 709  | 0.339 628  | -0.009     |
| 3                | 3.100 042  | 0.832 353  | -4.030 454 | 0.146      | 43 | 1.886 547  | 5.065 608  | -0.719 822 | 0.066      |
| 4                | 0.739 126  | 0.646 498  | -4.132 392 | -0.042     | 44 | -2.387 441 | -4.037 922 | 3.938 105  | -0.003     |
| 5                | -0.912 143 | 2.077 180  | -5.048 036 | -0.010     | 45 | -0.013 463 | -4.074 333 | 3.623 326  | 0.061      |
| 6                | -2.579 426 | 0.878 881  | -3.832 647 | -0.040     | 46 | 1.359 694  | -4.865 769 | 1.944 420  | 0.086      |
| 7                | -4.626 954 | 1.874 122  | -3.267 929 | 0.082      | 47 | 3.683 420  | -4.889 401 | 1.671 650  | -0.012     |
| 8                | -5.594 007 | 0.082 357  | -2.002 264 | 0.016      | 48 | 3.385 830  | -3.993 986 | -0.580 505 | 0.022      |
| 9                | -6.325 822 | 0.413 434  | 0.242 468  | 0.092      | 49 | 2.952 752  | -4.893 659 | -2.810 359 | -0.017     |
| 10               | -5.213 748 | -1.212 118 | 1.573 043  | 0.047      | 50 | 2.676 833  | -2.604 502 | -3.572 913 | -0.006     |
| 11               | -4.628 333 | -0.702 660 | 3.771 966  | -0.030     | 51 | 0.516 414  | -1.723 499 | -4.048 540 | 0.028      |
| 12               | -2.415 335 | -1.653 990 | 3.942 599  | -0.111     | 52 | -1.298 040 | -2.926 366 | -5.106 202 | -0.027     |
| 13               | -0.778 607 | -0.802 790 | 5.455 596  | -0.003     | 53 | -2.822 258 | -1.477 971 | -3.918 685 | 0.103      |
| 14               | 0.906 923  | -2.111 719 | 4.547 983  | 0.053      | 54 | -4.612 866 | -1.950 740 | -2.556 713 | 0.068      |
| 15               | 3.233 431  | -1.607 341 | 4.539 750  | 0.093      | 55 | -5.256 784 | -4.015 507 | -1.630 072 | -0.024     |
| 16               | 3.971 925  | -2.659 544 | 2.522 986  | -0.007     | 56 | -4.807 810 | -3.289 900 | 0.639 702  | 0.089      |
| 17               | 5.983 369  | -1.902 271 | 1.449 658  | 0.079      | 57 | -2.964 380 | -4.250 427 | 1.706 436  | -0.013     |
| 18               | 5.061 200  | -2.323 140 | -0.714 393 | 0.088      | 58 | -2.237 409 | -5.846 341 | 0.230 275  | -0.002     |
| 19               | 5.334 895  | 1.144 088  | -1.126 835 | 0.068      | 59 | 0.022 127  | -5.398 405 | 0.071 569  | 0.041      |
| 20               | 5.774 238  | 0.447 874  | 1.115 743  | 0.051      | 60 | 0.711 370  | -4.866 064 | -2.029 166 | 0.054      |
| 21               | 4.527 253  | 1.736 121  | 2.582 462  | 0.055      | 61 | -1.322 723 | -4.255 492 | -3.128 094 | 0.054      |
| 22               | 2.902 854  | 0.706 772  | 3.938 160  | 0.032      | 62 | -2.990 027 | -4.696 120 | -1.644 815 | 0.031      |
| 23               | 1.611 092  | 2.363 155  | 5.012 317  | -0.018     | 63 | 0.584 132  | 0.826 434  | -1.748 491 | 0.111      |
| 24               | -0.398 900 | 1.257 982  | 4.342 519  | -0.118     | 64 | -2.454 587 | 1.697 929  | -1.610 355 | -0.116     |
| 25               | -2.419 776 | 2.615 471  | 4.122 815  | 0.085      | 65 | -2.026 931 | -2.264 407 | -1.771 683 | -0.218     |
| 26               | -4.293 493 | 1.558 328  | 3.229 428  | 0.037      | 66 | -2.977 870 | -1.754 933 | 0.281 556  | -0.048     |
| 27               | -4.959 143 | 2.231 379  | 1.054 814  | 0.040      | 67 | -3.897 749 | 0.341 656  | -0.315 313 | -0.125     |
| 28               | -5.180 504 | 4.327 392  | -0.021 744 | -0.027     | 68 | 0.148 115  | -1.464 432 | -1.732 125 | -0.068     |
| 29               | -3.848 155 | 3.633 718  | -1.921 716 | -0.008     | 69 | 1.247 194  | -3.011 806 | -0.395 138 | -0.096     |
| 30               | -2.461 735 | 5.389 397  | -2.869 525 | -0.033     | 70 | 0.481 766  | -2.472 802 | 1.804 849  | -0.045     |
| 31               | -0.769 519 | 3.822 780  | -3.479 972 | 0.052      | 71 | 2.127 085  | -0.907 896 | 2.367 189  | -0.202     |
| 32               | 1.494 927  | 4.115 594  | -2.743 765 | 0.135      | 72 | -0.550 634 | 0.923 571  | 2.007 024  | 0.089      |
| 33               | 3.499 999  | 2.827 780  | -2.951 021 | -0.001     | 73 | -1.435 637 | -1.221 038 | 1.881 845  | -0.044     |
| 34               | 5.544 102  | 3.477 383  | -1.793 164 | -0.027     | 74 | 3.826 673  | -0.812 083 | 0.706 324  | -0.029     |
| 35               | 3.981 875  | 4.191 480  | -0.059 295 | -0.002     | 75 | 2.985 282  | 2.325 141  | 0.940 671  | -0.079     |
| 36               | 4.197 886  | 4.110 904  | 2.349 541  | 0.055      | 76 | 0.677 087  | 2.616 743  | 1.054 507  | -0.092     |
| 37               | 2.007 207  | 3.733 195  | 3.117 982  | 0.042      | 77 | -0.134 126 | 2.993 142  | -1.125 833 | -0.255     |
| 38               | 0.224 311  | 4.769 912  | 2.062 402  | 0.006      | 78 | -2.455 972 | 2.237 322  | 1.686 599  | -0.184     |
| 39               | -1.973 660 | 4.518 019  | 2.887 724  | 0.071      | 79 | 2.874 343  | 1.157 513  | -1.344 731 | -0.106     |
| 40               | -2.976 677 | 4.396 734  | 0.764 774  | 0.042      | 80 | 3.448 986  | -0.980 741 | -2.101 164 | -0.224     |



## 5. Lowest Vibrational Modes

It is crucial for the interpretation of the experimental data to get a feeling for the thermal excitation of the clusters for both measurements. A good indicator for this is the cluster velocity<sup>26</sup> which is different for both measurements shown in the paper. Another indicator are the vibrational nodes given by quantum chemical calculations. To give the readers a better understanding of the thermal excitation, the lowest vibrational modes are shown for the calculated clusters except for Si<sub>70</sub> and Si<sub>80</sub>, since frequency analyses of such large clusters are very expensive in regards to the computational resources and time consuming. Please note, that without a frequency analysis it cannot be clearly determined, if the shown geometric structures is only a local minimum on the potential curve, i.e. the cluster has imaginary vibrational modes. However, although the geometric structure can be slightly different in the local minimum, the general (near-)spherical shape of the cluster still remains. Therefore, the qualitative statement and discussion in the paper is still valid.

**Table S8.** Lowest vibrational modes for the discussed Si<sub>N</sub> clusters with  $N = 30 - 60$  computed at the PBE0/cc-pVTZ level of theory.

| Si | $\tilde{\nu}_{\min} / \text{cm}^{-1}$ |
|----|---------------------------------------|
| 30 | 38.79                                 |
| 35 | 75.11                                 |
| 40 | 44.31                                 |
| 45 | 90.73                                 |
| 50 | 60.45                                 |
| 55 | 70.66                                 |
| 60 | 47.93                                 |
| 70 | –                                     |
| 80 | –                                     |

## References

- [1] J. P. Perdew, M. Ernzerhof, K. Burke, *J. Chem. Phys.* **1996**, *105*, 9982–9985.
- [2] A. D. Becke, *J. Chem. Phys.* **1993**, *98*, 5648–5656.
- [3] J. P. Perdew, *Phys. Rev. B* **1986**, *33*, 8822–8824.
- [4] Y. Zhao, D. G. Truhlar, *Theor. Chem. Acc.* **2008**, *120*, 215–241.
- [5] J. Tao, J. P. Perdew, V. N. Staroverov, G. E. Scuseria, *Phys. Rev. Lett.* **2003**, *91*, 146401.
- [6] V. N. Staroverov, G. E. Scuseria, J. Tao, J. P. Perdew, *J. Chem. Phys.* **2003**, *119*, 12129–12137.
- [7] V. N. Staroverov, G. E. Scuseria, J. Tao, J. P. Perdew, *J. Chem. Phys.* **2004**, *121*, 11507.
- [8] A. V. Krukau, O. A. Vydrov, A. F. Izmaylov, G. E. Scuseria, *J. Chem. Phys.* **2006**, *125*, 224106.
- [9] T. M. Henderson, A. F. Izmaylov, G. Scalmani, G. E. Scuseria, *J. Chem. Phys.* **2009**, *131*, 044108.
- [10] T. Yanai, D. P. Tew, N. C. Handy, *Chem. Phys. Lett.* **2004**, *393*, 51–57.
- [11] A. F. Izmaylov, G. E. Scuseria, M. J. Frisch, *J. Chem. Phys.* **2006**, *125*, 104103.
- [12] M. A. Rohrdanz, K. M. Martins, J. M. Herbert, *J. Chem. Phys.* **2009**, *130*, 054112.
- [13] S. Grimme, *J. Chem. Phys.* **2006**, *124*, 034108.
- [14] F. Neese, T. Schwabe, S. Grimme, *J. Chem. Phys.* **2007**, *126*, 124115.

- [15] M. J. Frisch, G. W. Trucks, H. B. Schlegel, G. E. Scuseria, M. A. Robb, J. R. Cheeseman, G. Scalmani, V. Barone, G. A. Petersson, H. Nakatsuji, X. Li, M. Caricato, A. V. Marenich, J. Bloino, B. G. Janesko, R. Gomperts, B. Mennucci, H. P. Hratchian, J. V. Ortiz, A. F. Izmaylov, J. L. Sonnenberg, D. Williams-Young, F. Ding, F. Lipparini, F. Egidi, J. Goings, B. Peng, A. Petrone, T. Henderson, D. Ranasinghe, V. G. Zakrzewski, J. Gao, N. Rega, G. Zheng, W. Liang, M. Hada, M. Ehara, K. Toyota, R. Fukuda, J. Hasegawa, M. Ishida, T. Nakajima, Y. Honda, O. Kitao, H. Nakai, T. Vreven, K. Throssell, J. J. A. Montgomery, J. E. Peralta, F. Ogliaro, M. J. Bearpark, J. J. Heyd, E. N. Brothers, K. N. Kudin, V. N. Staroverov, T. A. Keith, R. Kobayashi, J. Normand, K. Raghavachari, A. P. Rendell, J. C. Burant, S. S. Iyengar, J. Tomasi, M. Cossi, J. M. Millam, M. Klene, C. Adamo, R. Cammi, J. W. Ochterski, R. L. Martin, K. Morokuma, O. Farkas, J. B. Foresman, D. J. Fox, *Gaussian 16*, Revision C.01, **2016**.
- [16] F. Neese, *Wiley Interdiscip. Rev. Comput. Mol. Sci.* **2012**, *2*, 73–78.
- [17] F. Neese, *Wiley Interdiscip. Rev. Comput. Mol. Sci.* **2018**, *8*, 1–6.
- [18] F. Neese, F. Wennmohs, U. Becker, C. Riplinger, *J. Chem. Phys.* **2020**, *152*, 224108.
- [19] S. Schäfer, B. Assadollahzadeh, M. Mehring, P. Schwerdtfeger, R. Schäfer, *J. Phys. Chem. A* **2008**, *112*, 12312–12319.
- [20] B. Assadollahzadeh, S. Schäfer, P. Schwerdtfeger, *J. Comput. Chem.* **2010**, *31*, 929–937.
- [21] D. A. Götz, A. Shayeghi, R. L. Johnston, P. Schwerdtfeger, R. Schäfer, *J. Chem. Phys.* **2014**, *140*, 164313.
- [22] D. A. Götz, A. Shayeghi, R. L. Johnston, P. Schwerdtfeger, R. Schäfer, *Nanoscale* **2016**, *8*, 11153–11160.
- [23] A. Lehr, M. Jäger, M. Gleditsch, F. Rivic, R. Schäfer, *J. Phys. Chem. Lett.* **2020**, *11*, 7827–7831.
- [24] A. Lehr, F. Rivic, M. Jäger, M. Gleditsch, R. Schäfer, *Phys. Chem. Chem. Phys.* **2022**, *24*, 11616–11635.
- [25] D. E. Woon, T. H. Dunning, *J. Chem. Phys.* **1993**, *98*, 1358–1371.
- [26] T. M. Fuchs, F. Rivic, R. Schäfer, *Phys. Rev. A* **2021**, *104*, 012820.
